# Supplementary material for: Clinical and genetic features of cervical dystonia in a large multicenter cohort
Source: PubMed Central journal article supplement — Neurol Genet. 2016 Apr 11;2(3):e69. doi: 10.1212/NXG.0000000000000069 (PMC4830199; doi:10.1212/nxg.0000000000000069), 2016-04-11
Supplement: supp_2.3.e69_Coinvestigators.pdf [file supp_2.3.e69_Coinvestigators.pdf]

## COINVESTIGATORS

*Dystonia Coalition.* Laura Marsh, MD (Baylor College of Medicine, Site Investigator); Ludy Shih, MD (Beth Israel Deaconess Medical Center, Site Investigator); Susan Bressman, MD (Beth Israel Medical Center, Site Investigator); Stewart Factor, DO (Emory University, Site Investigator); Marie Vidailhet, MD (Hôpital Universitaire Pitié-Salpêtrière, Site Investigator); Emmanuel Roze, MD, PhD (Hôpital Universitaire Pitié-Salpêtrière, Site Investigator); Zoltan Mari, MD (Johns Hopkins University, Site Investigator); Charles Adler, MD, PhD (Mayo Clinic Arizona, Site Investigator); Mark Hallett, MD (National Institutes of Neurological Diseases and Stroke Clinic, Site Investigator); Vesper F.M. L. Ramos, MD (National Institutes of Neurological Diseases and Stroke Clinic, Site Investigator); Stephen Grill, MD, PhD (Parkinson's and Movement Disorders Center of Maryland, Site Investigator); Christopher Goetz, MD (Rush University, Site Investigator); Tanya Harlow, MD (Sanford Health-Fargo, Site Investigator); Susan Fox, MB, ChB, PhD (Toronto Western Hospital, Site Investigator); David Standaert, MD, PhD (University of Alabama at Birmingham, Site Investigator); Oksana Suchowersky, MD (University of Alberta, Site Investigator); Fatta Nahab, MD (University of California San Diego, Site Investigator); Tao Xie, MD, PhD (University of Chicago, Site Investigator); Alberto Espay, MD (University of Cincinnati, Site Investigator); Michael Okun, MD (University of Florida, Site Investigator); Pedro Gonzalez-Alegre, MD, PhD (University of Iowa, Site Investigator); Ergun Uc, MD (University of Iowa, Site Investigator); Christine Klein, MD (University of Lübeck, Site Investigator); Sarah Pirio Richardson, MD (University of New Mexico, Site Investigator); Alfredo Berardelli, MD (University of Rome Sapienza, Site Investigator); Giovanni Fabbrini, MD (University of Rome Sapienza, Site Investigator); William Ondo, MD (University of Texas, Site Investigator); Claudia Testa, MD, PhD (Virginia Commonwealth University, Site Investigator); Alison Brashear, MD (Wake Forest School of Medicine, Site Investigator)

*Dystonia Genetic Consortium.* Ronald F. Pfeiffer, MD (University of Tennessee Health Science Center, Site Investigator); Monika Rudzińska, MD, PhD (Jagiellonian University Medical College, Site Investigator); Zbigniew K. Wszolek, MD (Mayo Clinic Jacksonville, Site Investigator); Ryan J. Uitti, MD (Mayo Clinic Jacksonville, Site Investigator); Jay A. Van Gerpen, MD (Mayo Clinic Jacksonville, Site Investigator); Robert W. Bastian, MD (Bastian Voice Institute, Site Investigator).
