# Supplementary material for: Clinical and genetic features of cervical dystonia in a large multicenter cohort
Source: PubMed Central journal article supplement — Neurol Genet. 2016 Apr 11;2(3):e69. doi: 10.1212/NXG.0000000000000069 (PMC4830199; doi:10.1212/nxg.0000000000000069), 2016-04-11
Supplement: supp_2.3.e69_SupplementalData.pdf [file supp_2.3.e69_SupplementalData.pdf]

## appendix e-1

*HRM and Sanger Sequencing.* HRM was performed with the LightCycler 480 Real-Time PCR system and High Resolution Master Mix (Roche; Indianapolis, IN, USA). Reactions were performed in either 96- or 384-well plates, using 40 ng of template DNA, 1× HRM Master Mix, 2.5 mM MgCl<sub>2</sub>, and 200 nM of each primer in a 10-μl reaction volume. Melting curves and difference plots were analyzed by at least two investigators blinded to phenotype. Shifted melting curves were further investigated using ExoSAP-IT<sup>®</sup> (Affymetrix; Santa Clara, CA, USA)-cleaned PCR products and bidirectional Sanger sequencing.

*In Silico Analyses.* SIFT (<http://sift.jcvi.org/>) is a sequence homology-based tool that sorts intolerant from tolerant amino acid substitutions and predicts whether an amino acid substitution at a particular position in a protein will have a phenotypic effect. MutationTaster (<http://www.mutationtaster.org>) applies a naïve Bayes classifier to data derived from evolutionary conservation, splice-site changes, loss of protein features and changes that might affect the amount of messenger RNA to predict disease potential. PolyPhen-2 (<http://genetics.bwh.harvard.edu/pph2/>) predicts pathogenicity by applying a probabilistic classifier to sequence- and structure-based information. CADD (<http://cadd.gs.washington.edu/>) predicts pathogenicity of the variants from the whole genome by training a linear kernel support vector machine (SVM) to differentiate evolutionarily derived possibly benign alleles from simulated conceivably deleterious variants. CADD raw scores offer superior resolution across the entire spectrum of scores and are suggested for use in large case-control studies of single or multiple genes. In contrast, scaled CADD Scores (PHRED-like), which range from 0 to 99, may be most useful for identifying causal variants within an individual exome or genome. A scaled CADD score of 10 corresponds to the top 10% deleterious variants whereas a score of 20 corresponds to the top 1% of deleterious variants and so forth.

*Population Controls.* The EVS dataset is comprised of 2203 African-American and 4300 European-American unrelated individuals. The EVS cohort includes controls, extremes of specific traits such as cholesterol and blood pressure and specific diseases such as myocardial infarction and stroke. The 1KG cohort includes individuals of Asian, African and European ancestry. 1KG samples are mostly anonymous and have no associated phenotypic data. ExAC provides data on 60,706 unrelated individuals sequenced as part of various disease-specific and population genetic studies. In general, SVs reported in EVS, 1KG and ExAC have not been confirmed with bidirectional Sanger sequencing.

**Table e-1**  
**Clinical diagnoses and demographics for additional screening of TOR1A Exon 5**

| Clinical diagnosis                 | Number<br>(age of onset) <sup>a</sup>    | Family<br>history <sup>b</sup> | Gender     |            | Race/Ethnicity |           |           | Sequence Variant (n) <sup>c</sup> |
|------------------------------------|------------------------------------------|--------------------------------|------------|------------|----------------|-----------|-----------|-----------------------------------|
|                                    |                                          |                                | Male       | Female     | Caucasian      | Jewish    | Other     |                                   |
| Spasmodic<br>dysphonia             | 128<br>(48.8 ± 8.8, 13-80)               | 13.3%                          | 40         | 88         | 114            | 2         | 12        |                                   |
| Cervical dystonia                  | 319<br>(44.4 ± 7.1, 10 -85)              | 13.2%                          | 77         | 242        | 301            | 5         | 13        | c. 907_909delGAG (1)              |
| Blepharospasm                      | 145<br>(57.7 ± 5.2, 11-79)               | 7.6%                           | 47         | 98         | 142            | 0         | 3         |                                   |
| Writer's cramp                     | 13<br>(34.8 ± 13.2, 7-60)                | 7.7%                           | 8          | 5          | 11             | 0         | 2         |                                   |
| Other primary focal<br>dystonia    | 58<br>(44.1 ± 10.8, 1-84)                | 17.2%                          | 18         | 40         | 51             | 1         | 6         |                                   |
| Segmental dystonia                 | 85<br>(44.1 ± 8.6, 5-78)                 | 18.8%                          | 23         | 62         | 73             | 0         | 12        | c.962C>T (1)                      |
| Multifocal &<br>generalized        | 24<br>(22.2 ± 9.9, 1-68)                 | 33.3%                          | 7          | 17         | 18             | 3         | 3         | c. 907_909delGAG (2)              |
| <b>Dystonia totals</b>             | <b>772</b><br><b>(46.7 ± 10.0, 1-85)</b> | <b>13.6%</b>                   | <b>220</b> | <b>552</b> | <b>710</b>     | <b>11</b> | <b>51</b> |                                   |
| Other movement<br>disorders        | 214<br>(48.4 ± 10.6, 1-76)               | NA                             | 102        | 112        | 189            | 3         | 22        |                                   |
| Neurologically-<br>normal controls | 174<br>(53.3 ± 10.1, 18-87) <sup>d</sup> | NA                             | 68         | 106        | 118            | 2         | 56        |                                   |
| <b>Grand total</b>                 | <b>1160</b>                              |                                |            |            |                |           |           |                                   |

<sup>a</sup>Mean +/- standard error, range (yrs).

<sup>b</sup>First- or second-degree relative with dystonia.

<sup>c</sup>(n) - number of subjects with identified SV

<sup>d</sup>Age at study enrollment.

NA = not available or applicable.

**Table e-2**  
**Primers for Sanger Sequencing and High Resolution Melting**

| <b>Primer</b>    | <b>Sequence (5'→3')</b> | <b>Locus</b>            | <b>Exon</b> | <b>Product (bp)</b>  |
|------------------|-------------------------|-------------------------|-------------|----------------------|
| <b>GNAL_E1aF</b> | aatgcaaatgaccctctgg     | NC_000018 11689089-109  |             |                      |
| <b>GNAL_E1aR</b> | ccggggcgtcagccgac       | NC_000018 11689973-957  | Exon 1a     | 885 (with GNAL_E1aF) |
| <b>GNAL_E2F</b>  | cctgctctgaatcggaaac     | NC_000018 11752280-299  |             |                      |
| <b>GNAL_E2R</b>  | atttctacacgcgggttc      | NC_000018 11752751-733  | Exon 2      | 472 (with GNAL_E2F)  |
| <b>GNAL_E3F</b>  | ccggctagtggtagagatg     | NC_000018 11752783-802  |             |                      |
| <b>GNAL_E3R</b>  | aagcacttttgggacgtctg    | NC_000018 11752995-976  | Exon 3      | 213 (with GNAL_E3F)  |
| <b>GNAL_E4F</b>  | ggaaatttaaatcccactcaa   | NC_000018 11753547-568  |             |                      |
| <b>GNAL_E5R</b>  | aaaatggttccatcttctact   | NC_000018 11753995-975  | Exons 4 & 5 | 449 (with GNAL_E4F)  |
| <b>GNAL_E6F</b>  | tttcagttcttttctcttt     | NC_000018 11824835-856  |             |                      |
| <b>GNAL_E6R</b>  | tgatgcaatcatattcttcaa   | NC_000018 11825069-048  | Exon 6      | 235 (with GNAL_E6F)  |
| <b>GNAL_E7F</b>  | gggaaagtgggagagaaac     | NC_000018 11862344-362  |             |                      |
| <b>GNAL_E7R</b>  | tctcaaagtttctgtgtgtgg   | NC_000018 11862493-472  | Exon 7      | 150 (with GNAL_E7F)  |
| <b>GNAL_E8F</b>  | atacccggtcttaccttga     | NC_000018 11864464-483  |             |                      |
| <b>GNAL_E8R</b>  | gaagccccctaaacctcac     | NC_000018 11864687-668  | Exon 8      | 224 (with GNAL_E8F)  |
| <b>GNAL_E9F</b>  | atgtgtgaacgtggaacct     | NC_000018 11867062-081  |             |                      |
| <b>GNAL_E9R</b>  | tgctgagtgttagaattcactcc | NC_000018 11867278-256  | Exon 9      | 217 (with GNAL_E9F)  |
| <b>GNAL_E10F</b> | ctgagtagctgctgggtgtg    | NC_000018 11868457-476  |             |                      |
| <b>GNAL_E10R</b> | cctggcctgagcgtatttt     | NC_000018 11868736-718  | Exon 10     | 280 (with GNAL_E10F) |
| <b>GNAL_E11F</b> | ctatgttagagcacttctatg   | NC_000018 11872201-222  |             |                      |
| <b>GNAL_E11R</b> | aaacaattctattcctcaatcat | NC_000018 11872443-421  | Exon 11     | 570 (with GNAL_E11F) |
| <b>GNAL_E12F</b> | ccttctgttttcgtagagttg   | NC_000018 11876547-569  |             |                      |
| <b>GNAL_E12R</b> | gaaggaggtagaaaaacaagg   | NC_000018 11876727-705  | Exon 12     | 181 (with GNAL_E12F) |
| <b>GNAL_E13F</b> | tcctccccagagtacatgc     | NC_000018 11880928-947  |             |                      |
| <b>GNAL_E13R</b> | agagactctgcctcctaccat   | NC_000018 11881218-198  | Exon 13     | 291 (with GNAL_E13F) |
| <b>THAP1_E1F</b> | aagaagcgagggaatccaac    | NT_007995 13018721-702  |             |                      |
| <b>THAP1_E1R</b> | ccccaccggctgaga         | NT_007995 13018509-525  | Exon 1      | 213 (with THAP1_1F)  |
| <b>THAP1_E2F</b> | tttgggtgcctttattttt     | NT_007995 13014975-955  |             |                      |
| <b>THAP1_E2R</b> | caaaaagcaaccaatatttta   | NT_007995 13014683-704  | Exon 2      | 293 (with THAP1_2F)  |
| <b>THAP1_E3F</b> | tggtcagtccacagattcttt   | NT_007995 13013940-919  |             |                      |
| <b>THAP1_E3R</b> | tgtggtattgccccattaga    | NT_007995 13013452-471  | Exon 3      | 489 (with THAP1_3F)  |
| <b>TOR1A_E5F</b> | cagcacctgtttcttctcc     | NC_000009 132576505-525 |             |                      |
| <b>TOR1A_E5R</b> | ccaactccaggcagtgactc    | NC_000009 132576212-231 | Exon 5      | 283 (with TOR1A_5F)  |
